# Supplementary material
Source: Royal Society of Chemistry journal article supplement (doi:10.1039/d6ce00228e)
Supplement: d6ce00228e1.pdf [file d6ce00228e1.pdf]

Supporting Information

## 2D Stranski–Krastanov Growth of Planar AuAg Nano-Dendrimers for Enhanced Visible-Light Plasmonic Catalysis

Qiuxiang Sun,<sup>a†</sup> Xiangyu Tong,<sup>bc†</sup> Xusheng Chen,<sup>d</sup> Zhaoqiang Wang,<sup>d</sup> Xiaohu Wu,<sup>be\*</sup>  
Yanyun Ma,<sup>f\*</sup> Yiqun Zheng<sup>g\*</sup>

<sup>a</sup> Jining Institute of Quality & Metrology Inspection, Jining, Shandong 272000, China

<sup>b</sup> Yangtze Laboratory, Wuhan 430205, China

<sup>c</sup> College of Electromechanical Engineering, Qingdao University of Science and Technology, Qingdao, Shandong 266061, China

<sup>d</sup> School of Resource & Environment and Safety Engineering, Jining University, Qufu, Shandong 273155, China

<sup>e</sup> School of Integrated Circuits, Hubei University, Wuhan 430062, China

<sup>f</sup> Institute of Functional Nano & Soft Materials (FUNSOM), Jiangsu Key Laboratory of Advanced Negative Carbon Technologies, Soochow University, Suzhou, Jiangsu 215123, China

<sup>g</sup> School of Chemistry, Chemical Engineering, and Materials, Jining University, Qufu, Shandong 273155, China

**†These authors contribute equally to this work.**

**\*Corresponding authors:** Prof. Dr. Y. Zheng, E-mail: yzheng@jnxu.edu.cn; Prof. Dr. X. Wu, wuxiaohu@pku.org.cn; Prof. Y. Ma, E-mail: mayanyun@suda.edu.cn

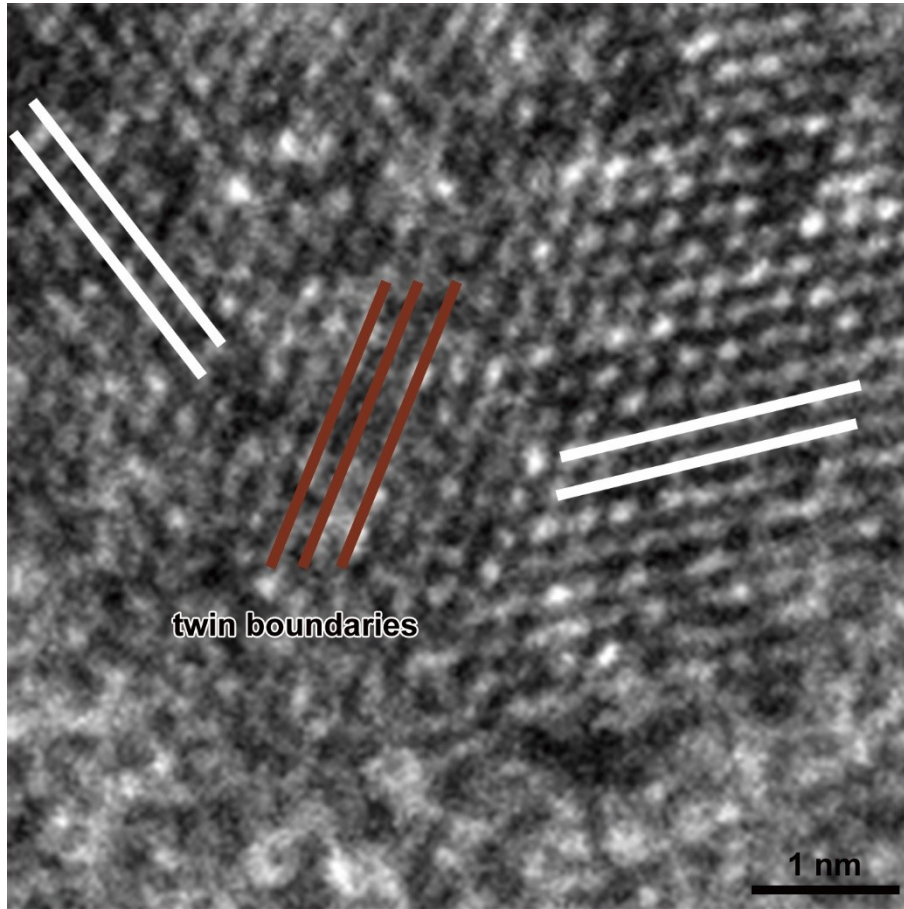

**Figure S1.** HRTEM image of AuAg NDMs at the branching node.

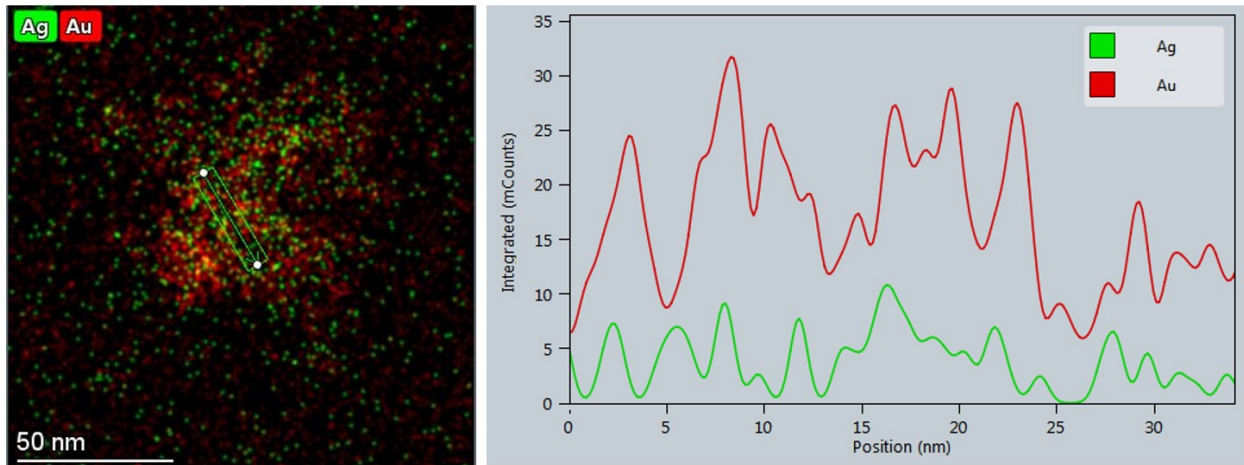

**Figure S2.** EDX-STEM line-scan profile across an individual 2D AuAg NDM.

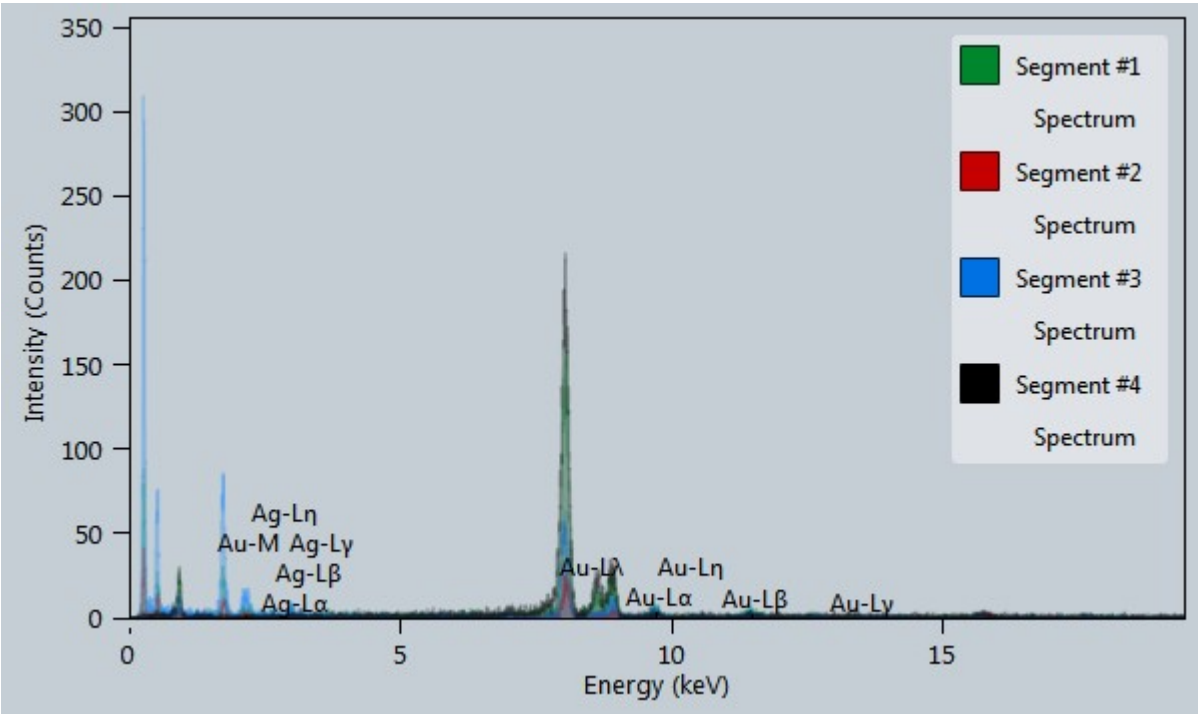

**Figure S3.** EDS spectra of 2D AuAg NDMs.

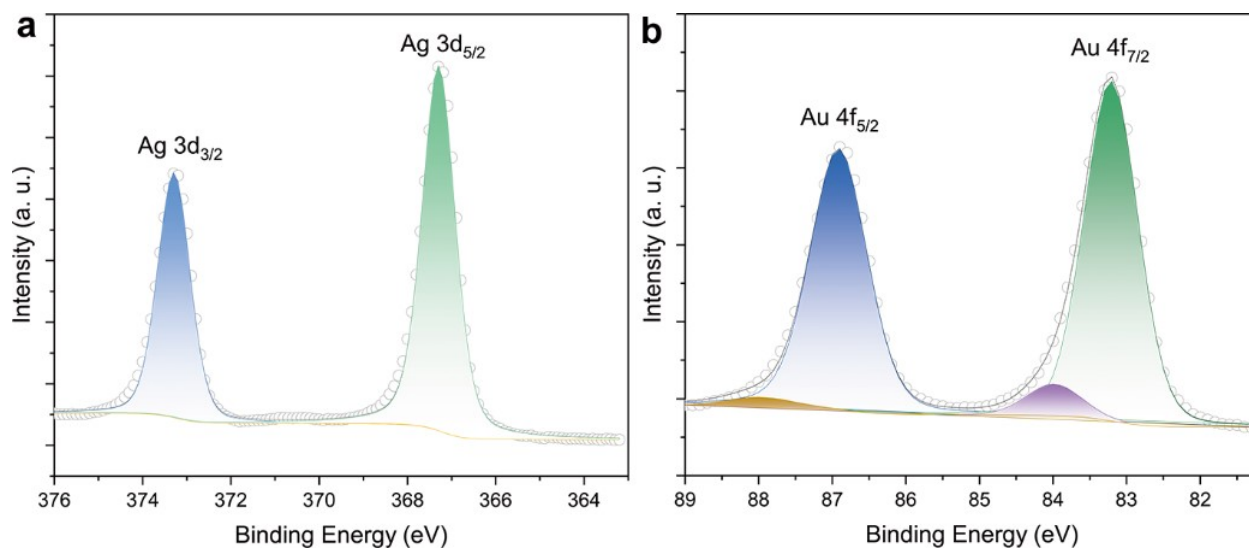

**Figure S4.** XPS spectra of AuAg NDMs: (a) Ag 3d; (b) Au 4f.

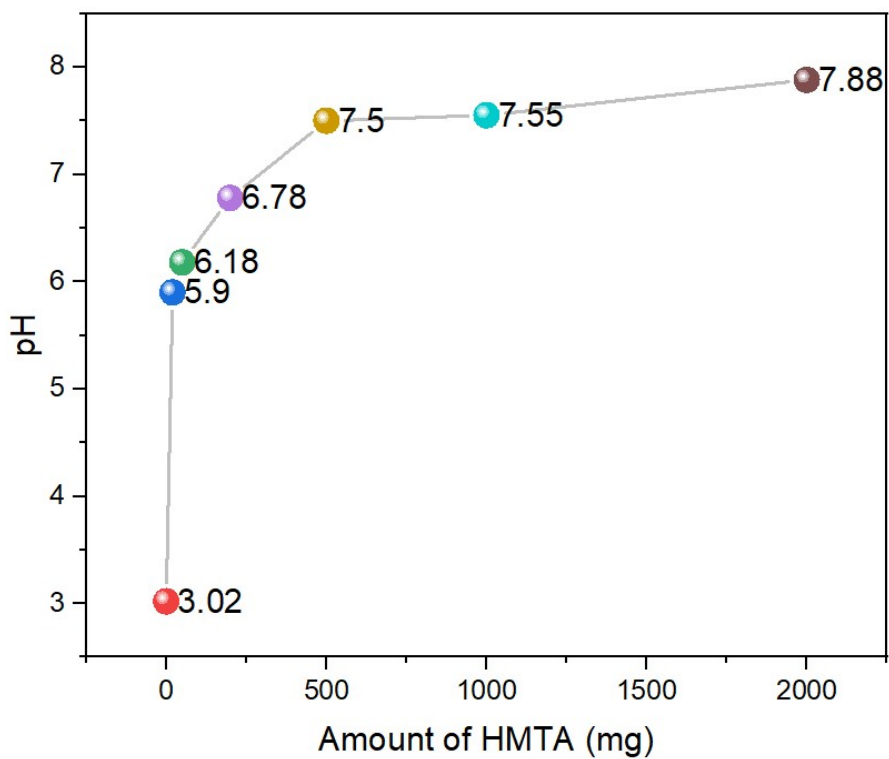

**Figure S5.** Plot showing the change of pH versus the amount of HMTA.

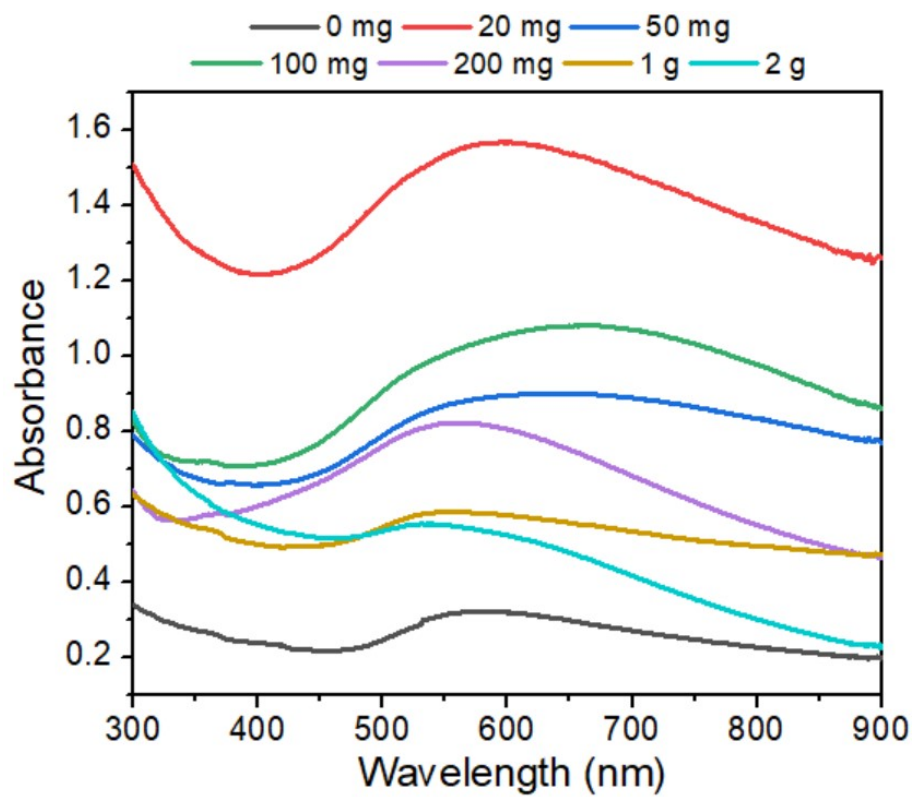

**Figure S6.** UV-Vis extinction spectra of the AuAg nanostructures synthesized with varying amounts of HMTA.

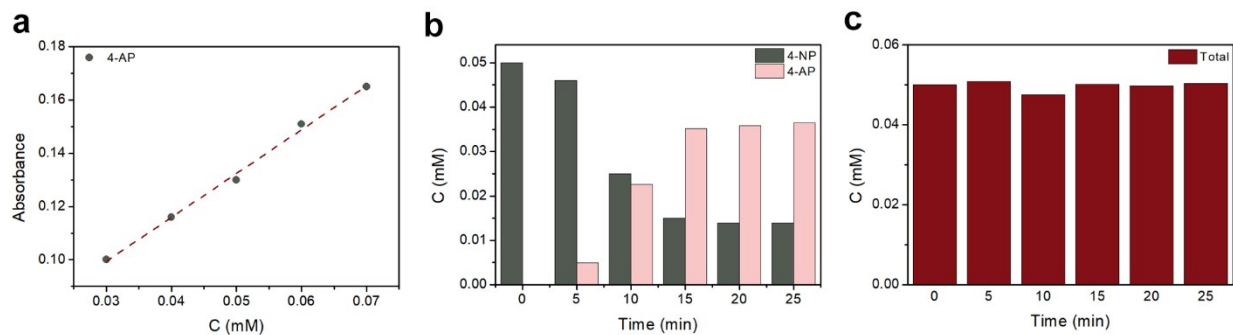

**Figure S7.** Calibration curves and kinetic data for 4-NP and 4-AP. (a) Calibration plots showing the linear relationship between absorbance and concentration for 4-nitrophenol (4-NP) and 4-aminophenol (4-AP). (b, c) Histograms depicting the concentration profiles of 4-NP and 4-AP at various time points during the reaction, showing (b) individual concentrations and (c) the total concentration of both species over time.

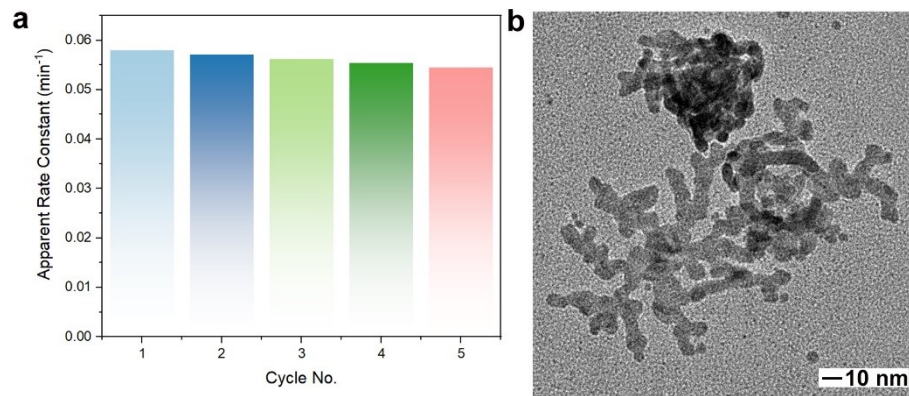

**Figure S8.** (a) Apparent rate constants for five consecutive catalytic cycles under 590 nm LED irradiation. (b) TEM image of AuAg NDMs after the fifth cycle.
